# Supplementary material for: A single neural network for cone-beam computed tomography-based radiotherapy of head-and-neck, lung and breast cancer
Source: PubMed Central journal article supplement — Phys Imaging Radiat Oncol. 2020 May 25;14:24–31. doi: 10.1016/j.phro.2020.04.002 (PMC7807541; doi:10.1016/j.phro.2020.04.002), 2020-05-25
Supplement: mmc1.pdf [file mmc1.pdf]

## Supplementary Material

“A single neural network for cone-beam computed tomography-based radiotherapy of head-and-neck, lung and breast cancer”

---

### Abstract

This file contains the supplementary material reporting: a collection of patient demographics 1, the imaging protocols 2, a description of the network architecture adopted 3, an overview of additional metric for the image comparison 4, and images for further patients 5.

---

### 1. Patient demographics

Sex, age, tumour type, tumour stage, dose prescription in terms of total dose, fractionation scheme, linac on which the CBCT have been acquired and number of days between the acquisition of CBCT and CT were reported for all the patients in the training, validation and test set for head-and-neck (Table S1), breast (Table S2) and lung (Table S3). The gender is expressed as male (M) or female (F). The tumour type can be accompanied by the specification of the location of the tumour, e.g. right (R) or left (L). Also, the following abbreviations have been introduced: SupraClav for supra clavicularis, local or locoreg for local and loco-regional treatment. In the prescription SIB stands for simultaneous integrated boost; boost indicates a sequential boost, adjuv if treatment is intended as an adjuvant therapy, reirr in the case of reirradiation, pall in case of palliative treatment, lymph when elective irradiation was considered. Other abbreviations are reported in the caption of each table. For the patients in the training set, the CBCT have been the closest to CT or rCT. For the patients in the test set, the RT plan was briefly described in terms of angle of the beam and the arc of irradiation for intensity-modulated radiotherapy (IMRT) and volumetric modulated arc therapy (VMAT). Also, the volumetric percentage difference of the body between rCT ( $\Delta V_{rCT}$ ) and sCT ( $\Delta V_{sCT}$ ) to CT in  $Mask_{CBCT}$  was reported.

Table S 1: Overview of the patient demographic for the **head-and-neck** cancer patients split in training, validation and test set.

| Pt Set no.        | Age [y] | Sex  | Tumour                | Stage [TNM] | Prescription      | Frac no. | Dose per frac. [Gy] | Plan* Linac | CBCT- rCT- $\Delta V_{rCT}$ [%] | to-CT [d] | $\Delta V_{sCT}$ [%] |
|-------------------|---------|------|-----------------------|-------------|-------------------|----------|---------------------|-------------|---------------------------------|-----------|----------------------|
| <b>Training</b>   |         |      |                       |             |                   |          |                     |             |                                 |           |                      |
| H1                | M       | 60.4 | Oropharynx R          | T3N2b       | 70Gy SIB          | 35       | 2.0                 | U09         | 3                               |           |                      |
| H2                | M       | 67.3 | Larynx glottid        | cT1aN0      | 60Gy              | 25       | 2.4                 | U11         | 1                               |           |                      |
| H3                | M       | 48.1 | Tongue R              | pT4aN2b     | 66Gy SIB          | 33       | 2.0                 | U14         | 3                               |           |                      |
| H4                | M       | 68.6 | Larynx                | pT4cN0      | 66Gy SIB          | 33       | 2.0                 | U14         | 32                              |           |                      |
| H5                | M       | 62.7 | Nasopharynx           | cTxN2cMx    | 70Gy SIB          | 35       | 2.0                 | U14         | 0                               |           |                      |
| H6                | M       | 58.6 | Nasopharynx           | T1N2        | 70Gy SIB          | 35       | 2.0                 | U11         | 4                               |           |                      |
| H7                | M       | 71.6 | Oropharynx            | T2N3        | 70Gy              | 35       | 2.0                 | U14         | 1                               |           |                      |
| H8                | M       | 54.5 | Oropharynx            | T4aN2cM0    | 46Gy, boost 70Gy  | 23       | 2.0                 | U14         | 2                               |           |                      |
| H9                | M       | 53.6 | Tonsil                | T2N2aM0     | 70Gy SIB          | 35       | 2.0                 | U11         | 0                               |           |                      |
| H10               | M       | 69.7 | Parotis L (meths SCC) | T4NxM1      | 66Gy adjuv        | 33       | 2.0                 | U14         | 4                               |           |                      |
| H11               | M       | 49.0 | Oropharynx R          | cT1cN2acM0  | 70Gy SIB          | 35       | 2.0                 | U09         | 3                               |           |                      |
| H12               | M       | 66.8 | Oropharynx (tonsil)   | cT2N2b      | 70Gy SIB          | 35       | 2.0                 | U11         | 2                               |           |                      |
| H13               | F       | 70.5 | Parotis L             | T1aN0       | 50Gy              | 25       | 2.0                 | U14         | 4                               |           |                      |
| H14               | F       | 61.3 | Hypopharynx R         | T2N1M0      | 46Gy SIB          | 23       | 2.0                 | U14         | 5                               |           |                      |
| H15               | F       | 52.3 | Nasopharynx           | cT3N2bM0    | 46Gy SIB          | 23       | 2.0                 | U14         | 2                               |           |                      |
| <b>Validation</b> |         |      |                       |             |                   |          |                     |             |                                 |           |                      |
| H16               | M       | 74.6 | Tonguebasis           | T4N2c       | 70Gy SIB          | 35       | 2.0                 | U14         | 0                               | 261       |                      |
| H17               | M       | 67.3 | SupraClav R           | cT4N3M1     | 16Gy reirr        | 2        | 8.0                 | U05         | 0                               |           |                      |
| H18               | F       | 54.3 | Hypopharynx axilla R  | cT1N3M1     | 70Gy              | 35       | 2.0                 | U14         | 10                              | 34        |                      |
| H19               | M       | 85.6 | Tonsil epiglottis     | T2N1        | 69Gy              | 30       | 2.3                 | U11         | 12                              | 121       |                      |
| H20               | M       | 74.5 | Non-Hodgkin Lymph     | Deauville V | 30Gy pall         | 10       | 3.0                 | U12         | 3                               |           |                      |
| H21               | M       | 67.3 | Tongue R              | cT1N2bM1    | 48Gy prim + lymph | 16       | 3.0                 | U12         | 16                              |           |                      |
| H22               | F       | 53.5 | Hypopharynx           | T4a         | 70Gy SIB          | 35       | 2.0                 | U12         | -6                              | 32        |                      |
| h23               | F       | 71.4 | Head L                | cT3N2M1b    | 20Gy pall reirr   | 5        | 4.0                 | U05         | 4                               |           |                      |
| <b>Test</b>       |         |      |                       |             |                   |          |                     |             |                                 |           |                      |
| H24               | M       | 71.4 | Hypopharynx L         | T4aN2b      | 70Gy SIB          | 35       | 2.0                 | 360°        | 55                              | 56        | -7.8                 |
| H25               | M       | 64.0 | Head R                | T3N1        | 46Gy              | 23       | 2.0                 | 360°        | 47                              | 47        | -9.7                 |
| H26               | M       | 67.3 | Supraglottis          | T2N0M0      | 70Gy SIB          | 35       | 2.0                 | 360°        | 63                              | 64        | -6.6                 |
| H27               | F       | 74.7 | Parotis L             | pT3N2b      | 47Gy SIB          | 15       | 1.8                 | 360°        | 16                              | 20        | -3.1                 |
| H28               | M       | 55.3 | Oropharynx            | T2N0M0      | 70Gy SIB          | 12/35    | 2.0                 | 180°        | 53                              | 49        | -2.7                 |
| H20               | M       | 62.0 | Oropharynx            | cT4aN2c     | 47Gy SIB          | 15       | 1.8                 | 180°        | 44                              | 44        | -4.0                 |
| H30               | M       | 61.2 | Parotis R             | cT0N2aM0    | 69Gy              | 3/33     | 2.3                 | 170°        | 43                              | 35        | -1.8                 |
| H31               | M       | 52.0 | Oropharynx L tongue L | cT4N3bM0    | 70Gy SIB          | 35       | 2.0                 | 360°        | 39                              | 34        | -0.3                 |
| H32               | F       | 53.7 | Mouth bed             | pT4acN0M0   | 70Gy adjuv        | 12/35    | 2.0                 | 170°        | 67                              | 62        | 1.6                  |
| H33               | M       | 75.5 | Glottis Larynx R      | cT2N0M0     | 70Gy              | 35       | 2.0                 | 360°        | 34                              | 34        | -8.0                 |

\*VMAT plans with 6 MV energy were generally delivered plans indicates the degree of the arc.

Abbreviations: R = right; L = left; SIB = simultaneous integrated boost; reirr = reirradiation; pall = palliation; adjuv = adjuvant therapy; SupraClav = supra clavicular; SCC = squamous cell carcinoma; lymph = lymphonode irradiation;  $\Delta V_{rCT}$  = percentage difference of the volume in Mask<sub>CBCT</sub> of the body calculated in rCT respect to CT;  $\Delta V_{sCT}$  = percentage difference of the volume in Mask<sub>CBCT</sub> of the body calculated in sCT respect to CT.

Table S.2: Overview of the patient demographic for breast cancer patients split in training, validation and test set.

| Pt Set no. | Age [y] | Tumour               | Stage [TNM] | Prescription             | Frac no. per frac. [Gy] | Dose [Gy] | Plan* | Linac   | CBCCT- to-(r)CT [d] | rCT-CT to-CT [d] | $\Delta V_{r,CT}$ [%] | $\Delta V_{s,CT}$ [%] |
|------------|---------|----------------------|-------------|--------------------------|-------------------------|-----------|-------|---------|---------------------|------------------|-----------------------|-----------------------|
| B1         | F 57.6  | R                    | cT2-3N2M0   | 42.56Gy                  | 16                      | 2.66      |       | U10     | 0                   |                  |                       |                       |
| B2         | F 33.3  | L locoreg            | cT3N1M0     | 61.2Gy SIB + lymph       | 23                      | 2.66      |       | U12     | 1                   |                  |                       |                       |
| B3         | F 46.6  | R local              | pT1cN1      | 46Gy SIB                 | 21                      | 2.66      |       | U12     | 5                   |                  |                       |                       |
| B4         | F 52.2  | R local              | cT2N0M0     | 46Gy SIB                 | 21                      | 2.66      |       | U11     | 2                   |                  |                       |                       |
| B5         | F 45.8  | R                    | cT2N0M0     | 46Gy SIB                 | 21                      | 2.66      |       | U05     | 5                   |                  |                       |                       |
| B6         | F 63.3  | R locoreg            | cT2N1M0     | 46Gy                     | 21                      | 2.66      |       | U14     | 4                   |                  |                       |                       |
| B7         | F 59.5  | R                    | pT2N0       | 42.56Gy reirr            | 16                      | 2.66      |       | U04     | 5                   |                  |                       |                       |
| B8         | F 84.9  | R                    | pT2N3M0     | 61.2Gy SIB               | 23                      | 2.66      |       | U11     | 2                   |                  |                       |                       |
| B9         | F 60.0  | R                    | cT2N2M0     | 46Gy SIB                 | 21                      | 2.66      |       | U04     | 4                   |                  |                       |                       |
| B10        | F 66.7  | L locoreg            | cT2N2M0     | 42.56Gy                  | 16                      | 2.66      |       | U11     | 5                   |                  |                       |                       |
| B11        | F 67.1  | R                    | pT1G2N0     | 42.56Gy                  | 16                      | 2.66      |       | U04     | 1                   |                  |                       |                       |
| B12        | F 69.4  | L local              | cT2N0Mx     | 46Gy SIB + 21x0.5 seq    | 21                      | 2.66      |       | U11     | 4                   |                  |                       |                       |
| B13        | F 93.7  | R                    | pT1N1       | 24Gy pall                | 3                       | 8.00      |       | U04,U10 | 2                   |                  |                       |                       |
| B14        | F 67.7  | R                    | cT2-3N2M0   | 42.56Gy                  | 16                      | 2.66      |       | U04,U07 | 4                   |                  |                       |                       |
| B15        | F 37.1  | R                    | cT1N0       | 46Gy SIB                 | 21                      | 2.66      |       | U04     | 4                   |                  |                       |                       |
| B16        | F 56.5  | R postop             | pT1N0       | 55.86Gy SIB              | 21                      | 2.17      |       | U10     | 14                  | /                |                       |                       |
| B17        | F 57.2  | Thorax               | T23         | 45.57 local              | 21                      | 2.17      |       | U12     | -7                  | 54               |                       |                       |
| B18        | F 63.5  | R                    | cT2pN1M0    | 46Gy SIB neo-adjuv chemo | 23                      | 2.66      |       | U04     | 7                   | 49               |                       |                       |
| B19        | F 69.5  | R preop              | pT1aN0      | 42.56Gy                  | 16                      | 2.66      |       | U04     | 38                  | 27               |                       |                       |
| B20        | F 70.0  | L                    | pT4N0       | 60Gy SBRT                | 5                       | 12.00     |       | U09     | 47                  | 187              |                       |                       |
| B21        | F 67.7  | R postop             | cT2-3N2M0   | 42.56Gy adj              | 16                      | 2.66      |       | U04,U07 | 1                   | 44               |                       |                       |
| B22        | F 52.4  | R                    | pT1cG2N1    | 42.56Gy                  | 16                      | 2.66      |       | U05     | 7                   | 9-25             |                       |                       |
| B23        | F 67.6  | L                    | cT1cN0      | 15/20Gy SIB              | 1                       | 20.00     |       | U10     | 8                   |                  |                       |                       |
| B24        | F 76.8  | R postop             | pT1cN0      | 61.2Gy SIB               | 23                      | 2.66      |       | U04     | 14                  | 14               | 3.6                   | 6.8                   |
| B25        | F 50.3  | L postop             | pT1N0       | 61.2Gy SIB               | 23                      | 2.66      |       | U14     | 26                  | 26               | 5.4                   | 5.5                   |
| B26        | F 72.2  | L postop             | pT1cG2N1    | 42.56Gy lymph            | 16                      | 2.66      |       | U08     | 16                  | 14               | 3.5                   | 3.6                   |
| B27        | F 77.3  | L local              | pT3N1       | 61.2Gy SIB               | 23                      | 2.66      |       | U14     | 23                  | 22               | -3.5                  | 2.7                   |
| B28        | F 43.8  | R Thoraxwand locoreg | cT2mN3bM0   | 42.56Gy                  | 16                      | 2.66      |       | U14     | 8                   | 11               | -1.0                  | -0.4                  |
| B29        | F 74.1  | R locoreg            | pT1cpN2     | 42.56Gy lymph            | 16                      | 2.66      |       | U04     | 21                  | 21               | -1.6                  | -1.7                  |
| B30        | F 57.8  | L local              | cT2N1M0     | 42.56Gy                  | 16                      | 2.66      |       | U11     | 17                  | 17               | 8.3                   | 9.3                   |
| B31        | F 72.2  | L postop             | pT1cG2N1    | 42.56Gy lymph            | 16                      | 2.66      |       | U11     | 14                  | 12               | -2.8                  | -2.7                  |
| B32        | F 39.2  | L                    | pT1cN0M0    | 40.05Gy                  | 15                      | 2.67      |       | U12     | 20                  | 20               | -8.2                  | -13.9                 |
| B33        | F 42.3  | L postop             | cT1bN0/1    | 40.05Gy                  | 15                      | 2.67      |       | U12     | 31                  | 28               | 0.9                   | -0.4                  |

\* f = fields/beams of IMRT; if f is not indicated, a VMAT plan was delivered and the arc range is expressed in degree. Abbreviations: R = right; L = left; SIB = simultaneous integrated boost; reirr = reirradiation; pall = palliation; (neo) adjuv = (neo)adjuvant therapy; chemo = chemotherapy; seq = sequential; local = local treatment; locoreg = locoregional treatment; postop = postoperative irradiation; lymph = lymphonode irradiation;  $\Delta V_{r,CT}$  = percentage difference of the volume in Mask<sub>CBCCT</sub> of the body calculated in rCT respect to CT;  $\Delta V_{s,CT}$  = percentage difference of the volume in Mask<sub>CBCCT</sub> of the body calculated in sCT respect to CT.

Table S 3: Overview of the patient demographic for the lung cancer patients split in training, validation and test set.

| Set no. | Pt no. | Sex | Age [y] | Tumour           | Stage [TNM] | Prescription  | Frac no. | Dose per frac. [Gy] | Plan*     | Linac   | CBCCT- to-(r)CT [d] | rCT- to-CT [d] | $\Delta V_{rCT}$ [%] | $\Delta V_{sCT}$ [%] |
|---------|--------|-----|---------|------------------|-------------|---------------|----------|---------------------|-----------|---------|---------------------|----------------|----------------------|----------------------|
|         | L1     | F   | 55.2    | R NSCLC R        | cT4N2M1a    | 16Gy pall     | 2        | 8.00                |           | U05     | 0                   |                |                      |                      |
|         | L2     | F   | 77.8    | NSCLC R          | pT2bN3M1a-b | 8Gy pall      | 1        | 8.00                |           | U05     | 0                   |                |                      |                      |
|         | L3     | M   | 80.5    | R                | T4          | 8Gy pall      | 1        | 8.00                |           | U04     | 0                   |                |                      |                      |
|         | L4     | F   | 52.7    | R NSCLC recidive | T4          | 8Gy pall      | 1        | 8.00                |           | U05,U03 | 0                   |                |                      |                      |
|         | L5     | F   | 59.5    | Adenocarc postop | T4N1M1      | 30Gy          | 10       | 3.00                |           | U04,U05 | 18                  |                |                      |                      |
|         | L6     | F   | 59.9    | Meths            | T2-3        | 30Gy          | 10       | 3.00                |           | U09,U05 | 4                   |                |                      |                      |
|         | L7     | F   | 60.3    | Adenocarc R      | pT1N0M0     | 60Gy SBRT     | 5        | 12.00               |           | U09     | 2                   |                |                      |                      |
|         | L8     | F   | 61.2    | R + meths        | T2-3        | 30Gy          | 10       | 3.00                |           | U09     | 4                   |                |                      |                      |
|         | L9     | M   | 69.8    | R Thoraxwand     | T4N2M1c     | 8Gy           | 1        | 8.00                |           | U04     | 0                   |                |                      |                      |
|         | L10    | M   | 65.1    | L                | pT4aN0M0    | 8Gy reirr     | 1        | 8.00                |           | U05     | 1                   |                |                      |                      |
|         | L11    | M   | 55.7    | L NSCLC          | T4          | 20Gy          | 5        | 4.00                |           | U11     | 1                   |                |                      |                      |
|         | L12    | M   | 83.9    | L NSCLC          | cT4N0M0     | 39Gy          | 13       | 3.00                |           | U09,U14 | 1                   |                |                      |                      |
|         | L13    | M   | 60.6    | L NSCLC          | cT4N1M1c    | 8Gy pall      | 1        | 8.00                |           | U05     | 0                   |                |                      |                      |
|         | L14    | M   | 63.3    | SCLC             | cT2N2M0     | 39Gy          | 13       | 3.00                |           | U09     | 3                   |                |                      |                      |
|         | L15    | M   | 59.7    | R NSCLC          | cT4N4M1a    | 8Gy pall      | 1        | 8.00                |           | U05     | 0                   |                |                      |                      |
|         | L16    | M   | 70.6    | Mediastinum      | pT4N2M0     | 65Gy          | 25       | 3.00                |           | U12     | -25                 | 36             |                      |                      |
|         | L17    | M   | 59.4    | R NSCLC          | cT4N3M1     | 48Gy          | 16       | 3.00                |           | U9      | -9                  | 13             |                      |                      |
|         | L18    | M   | 62.5    | L SCLC           | cT3N3M0     | 45 Gy SIB     | 15       | 5.00                |           | U12     | 0                   | 78             |                      |                      |
|         | L19    | M   | 59.8    | L NSCLC          | T4          | 16Gy pall     | 2        | 8.00                |           | U09     | 5                   | /              |                      |                      |
|         | L20    | M   | 74.4    | L SCLC           | T4          | 8Gy           | 1        | 8.00                |           | U04     | 0                   | 159            |                      |                      |
|         | L21    | M   | 56.5    | R NSCLC local    | pT3N1M0     | 54 Gy pall    | 3        | 18.00               |           | U12     | 11                  | /              |                      |                      |
|         | L22    | F   | 8.9     | Wilms, both      | T1          | 12Gy+22Gy SIB | 8        | 1.5+2.75            |           | U15     | 14                  | /              |                      |                      |
|         | L23    | M   | 63.2    | L                | cT2N2M0     | 60Gy SBRT     | 8        | 7.50                |           | U15     | 24                  | 25             |                      |                      |
|         | L24    | M   | 64.0    | Adenocarc        | cT1cN2M0    | 65Gy          | 25       | 2.60                | 10MV 195° | U11     | 27                  | 28             | 2.5                  | -1.8                 |
|         | L25    | F   | 60.9    | NSCLC            | cT2N3M0     | 65 Gy         | 25       | 2.60                | 10MV 195° | U10     | 21                  | 21             | -4.2                 | -2.3                 |
|         | L26    | F   | 67.0    | L SCLC           | cT4N3M1c    | 30Gy SABRT    | 10       | 3.00                | 10MV 195° | U14     | 11                  | 11             | 5.3                  | -0.3                 |
|         | L27    | M   | 81.7    | L locoreg        | T4N2M0      | 36Gy SABRT    | 12       | 3.00                | 10MV 195° | U12     | 12                  | 14             | -2.6                 | -5.8                 |
|         | L28    | M   | 82.3    | R                | cT1aN0M0    | 65Gy          | 25       | 2.60                | 10MV 195° | U14     | 23                  | 23             | -1.4                 | 0.0                  |
|         | L29    | F   | 57.5    | Adenocarc R      | T2N4        | 60Gy SABRT    | 5        | 12.00               | 6MV 360°  | U04     | 27                  | 27             | 1.3                  | 2.8                  |
|         | L30    | M   | 63.3    | SCLC             | cT2N2M0     | 66Gy          | 33       | 2.00                | 10MV 195° | U09     | 8                   | 12             | 2.9                  | 3.4                  |
|         | L31    | M   | 81.8    | Adenocarc R      | cT3N3M0     | 3Gy pall      | 10       | 3.0                 | 10MV 2f*  | U14     | -47                 | -49            | 0.4                  | 1.1                  |
|         | L32    | F   | 73.1    | R NSCLC          | T3N2M0      | 65Gy          | 25       | 2.60                | 10MV 195° | U15     | 14                  | 16             | -1.1                 | -1.4                 |
|         | L33    | F   | 60.8    | L NSCLC          | T4N1M0      | 65Gy          | 25       | 2.60                | 10MV 195° | U08     | 22                  | 24             | 0.4                  | 0.5                  |

\* f = fields/beams of IMRT; if f is not indicated, a VMAT plan was delivered and the arc range is expressed in degree. Abbreviations: R = right; L = left; both = both lungs were irradiated; SIB = simultaneous integrated boost; NSCLC = Non-small-cell lung carcinoma; SCLC = Small-cell lung carcinoma; reirr = reirradiation; pall = palliation; SABRT = stereotactic ablative radiotherapy; SBRT = stereotactic body radiation therapy; postop = postoperative irradiation; adenocarc = adenocarcinoma;  $\Delta V_{rCT}$  = percentage difference of the volume in Mask<sub>CBCCT</sub> of the body calculated in rCT respect to CT;  $\Delta V_{sCT}$  = percentage difference of the volume in Mask<sub>CBCCT</sub> of the body calculated in sCT respect to CT.

## 2. Imaging Protocols

CTs were acquired on a Brilliance Big Bore (Philips Healthcare, Ohio, USA); CBCTs were acquired using X-ray volumetric imaging (XVI, v5.0.2b72 Elekta AB, Sweden) system. Table 4 reports the imaging protocols for CT, rescan CT (rCT) and CBCT for all the patients included in the study in terms of field-of-view (FOV), acquisition matrix (Acq matrix), resolution (Res), tube voltage (kVp), exposure (ms) and current (mA). CBCTs were acquired with 0.25 rotation/s gantry speed and 5.5 frames/s. All the CBCTs were acquired with a 200°-arc utilising an empty filter cassette (F0) in combination with a centred detector panel (S position, maximum FOV=27x27 cm<sup>2</sup>). The field-of-view (FOV) was in four cases (elective lymph-nodes irradiations or double-sided irradiation for breast and HN patients) enlarged to a maximum of 41x41 cm<sup>2</sup> using a shifted detector panel (M position) to accommodate the CTV in the CBCT FOV. Imaging frequency of CBCT followed the extended non-action limit protocol [1]: online corrections (action level 0 mm) were applied in the case of partial or ablative breast irradiation, and offline long (imaging the first three days and then every five) scheme were applied for irradiations having  $\geq 20$  and short scheme (imaging the first two days and then every two) for  $< 20$  fractions. Imaging frequency may have been increased after consultation between a medical physicist and a radiotherapist on a single patient-basis in case large inter-fraction motions were observed in the initial fractions or whenever RT technicians reported difficulties in reproducing the planning position.

Clinical set-up corrections were estimated within a clip-box including the CTV based on bone rigid (translation and rotation) matching [2]. For the breast patients treated with local RT followed by a sequential boost, a dual rigid registration was performed based first on bone matching followed by grey level (soft-tissue) matching [3, 4]. The centre of rotation was assigned as the centre of the PTV. In all cases, the set-up correction finally applied consisted of sole translation, trying to minimise the effect of rotations previously estimated.

Table S 4: Overview of CT (including also rescan (r)CT) and CBCT imaging protocols in terms of field-of-view (FOV), acquisition matrix (Acq matrix), resolution (Res), tube voltage (kVp), exposure (ms) and current (mA). For exposure and current, the mean value ( $\pm\sigma$ ) was reported along with the range.

| Modality | Site          | FOV <sup>a</sup><br>[cm <sup>3</sup> ] | Acq matrix <sup>a</sup> | Res <sup>a</sup><br>[mm <sup>3</sup> ] | Voltage <sup>b</sup><br>[kVp] | Exposure <sup>b</sup><br>[ms] | Current <sup>b</sup><br>[mA] |
|----------|---------------|----------------------------------------|-------------------------|----------------------------------------|-------------------------------|-------------------------------|------------------------------|
| (r)CT    | Head-and-neck | 43-70                                  | 512                     | 0.83-1.37                              | 120                           | 983±65                        | 159±50                       |
|          |               | 43-70                                  | 512                     | 0.83-1.37                              |                               | 923-1090                      | 47-271                       |
|          |               | 30-111                                 | 101-535                 | 2-3                                    |                               |                               |                              |
|          | Breast        | 47-70                                  | 512                     | 0.92-1.37                              | 120                           | 1050±109                      | 63±37                        |
|          |               | 47-70                                  | 512                     | 0.92-1.37                              |                               | 923-1332                      | 31-271                       |
|          |               | 31-120                                 | 103-400                 | 2-3                                    |                               |                               |                              |
|          | Lung          | 29-70                                  | 512                     | 0.57-1.37                              | 120                           | 3886±3095                     | 98±66                        |
|          |               | 29-70                                  | 512                     | 0.57-1.37                              |                               | 500-10091                     | 30-271                       |
|          |               | 23-220                                 | 76-660                  | 1-3                                    |                               |                               |                              |
| CBCT     | Head-and-neck | 27                                     | 135-270                 | 1-2                                    | 100 <sup>c</sup>              | 11±5                          | 14±3                         |
|          |               | 27                                     | 135-270                 | 1-2                                    |                               | 10-40                         | 10-20                        |
|          |               | 13-53                                  | 126-526                 | 1-2                                    |                               |                               |                              |
|          | Breast        | 27-41                                  | 270-540                 | 0.5-1                                  | 120                           | 33±2                          | 17±2                         |
|          |               | 27-41                                  | 270-540                 | 0.5-1                                  |                               | 32-40                         | 16-20                        |
|          |               | 26-53                                  | 262-526                 | 0.5-1                                  |                               |                               |                              |
|          | Lung          | 27                                     | 270                     | 1-2                                    | 120 <sup>d</sup>              | 31±6                          | 20±1                         |
|          |               | 27                                     | 270                     | 1-2                                    |                               | 10-40                         | 16-25                        |
|          |               | 26-53                                  | 128-528                 | 1-2                                    |                               |                               |                              |

<sup>a</sup>Expressed in RL, AP, FH directions; the range is reported in terms of min-max.

<sup>b</sup>Reported in terms of mean value and range=min-max.

<sup>c</sup>Except for H18 and H20 where kVP was 120.

<sup>d</sup>Except for L11, L22 and L24 where kVP was 100.

### 3. Network architecture

The cycle-GAN employed in this study was constituted by nine blocks of residual networks [5] as generators and by Patch-GANs [6] as discriminators. Figure S1 shows the architecture of the generator and discriminator. Stochastic gradient descent was used applying an Adam solver [7] with learning rate = 0.0002, momentum parameters  $\beta_1 = 0.5$  and  $\beta_2 = 0.999$ . Instance normalisation [8] was employed with a batch size of 1. The weights of the network were randomly initialised from  $\mathcal{N}(0, 0.02)$ . Weight optimisation was performed as in Goodfellow et al. [9] alternating between one gradient descent step on the discriminator network and one step on the generator network after having performed a forward and backward cycle. A structured loss function composed by  $\text{GAN} + \lambda \cdot \mathcal{L}_1 + \text{cycle-consistency}$  with  $\lambda = 25$  was adopted. The original implementation of the network by Zhu et al [10]<sup>1</sup> was modified to accommodate 16-bit grey-scale images with a size of 256x256.

Both networks were trained for 200 epochs on a Tesla P100 (16 Gb, NVIDIA, California, USA) graphical processing unit (GPU) with batch size one and image pool of 1000 images. Data augmentation was applied during training by flipping the images left and right and randomly cropping of 30x30 voxels after having bi-linearly resampled the images to 286x286 voxels in  $\text{Mask}_{\text{CBCT}}$ . Early stopping was applied controlling the average and  $\sigma$  of the  $\mathcal{L}_1$  within the body contour over the patients of the validation set: we selected the first epoch with average  $\mathcal{L}_1$  differing less than one  $\sigma$  compared to the following three epochs. Note that  $\mathcal{L}_1$  was calculated at every 10 epoch (a total of 20 models were stored, one each 10 epochs).

### 4. Image Comparison

Table 5 reports the similarity between the intensity of sCT, CBCT, CT and rCT calculated within  $\text{Mask}_{\text{CBCT}}$  in terms of peak signal-to-noise ratio (PSNR) and structural similarity index metric (SSIM) as proposed by Liang et al. [11].

Table S 5: Image comparison calculated as mean ( $\pm 1\sigma$ ) and range ([min; max]) of the test dataset (30 patients) compared to the reference dataset in terms of peak signal-to-noise ratio (PSNR) and structural similarity index metric (SSIM) between the Test and the Ref images. Values are expressed in dB for the PSNR.

| Site             |     | Head-and-Neck           |                          | Breast                  |                          | Lung                    |                          |
|------------------|-----|-------------------------|--------------------------|-------------------------|--------------------------|-------------------------|--------------------------|
| Test             | Ref | PSNR                    | SSIM                     | PSNR                    | SSIM                     | PSNR                    | SSIM                     |
|                  |     | [dB]                    |                          | [dB]                    |                          | [dB]                    |                          |
| CBCT             | rCT | 24.6±0.8<br>[23.1;26.1] | 0.46±0.05<br>[0.38;0.52] | 25.3±1.8<br>[22.2;28.1] | 0.71±0.04<br>[0.63;0.75] | 23.7±1.4<br>[22.2;26.7] | 0.69±0.04<br>[0.58;0.73] |
| sCT <sup>+</sup> | rCT | 30.5±2.2<br>[27.0;33.4] | 0.81±0.04<br>[0.75;0.88] | 29.0±2.1<br>[26.0;32.3] | 0.76±0.02<br>[0.72;0.79] | 28.5±1.6<br>[25.6;31.3] | 0.78±0.04<br>[0.72;0.88] |
| sCT*             | rCT | 30.6±2.2<br>[27.1;33.7] | 0.80±0.04<br>[0.74;0.85] | 28.8±2.0<br>[25.7;31.8] | 0.80±0.04<br>[0.74;0.85] | 28.4±1.4<br>[26.1;31.1] | 0.78±0.05<br>[0.72;0.87] |
| CT               | rCT | 27.9±1.9<br>[25.3;30.5] | 0.86±0.04<br>[0.80;0.92] | 28.2±2.3<br>[23.6;30.7] | 0.85±0.05<br>[0.74;0.90] | 27.0±1.9<br>[23.5;29.5] | 0.77±0.06<br>[0.63;0.83] |

<sup>+</sup> sCT obtained from a single network trained on all the anatomical sites.

\* sCT obtained from three different networks trained on each anatomical site.

### 5. Single patient overview

In the following pages are shown CBCT, CT, rCT and sCT as well as the image differences to CT, dose, dose differences and DVH for the patients in the test set for whom analysis of DVH-points reported dose

<sup>1</sup><https://github.com/xhujoy/CycleGAN-tensorflow>

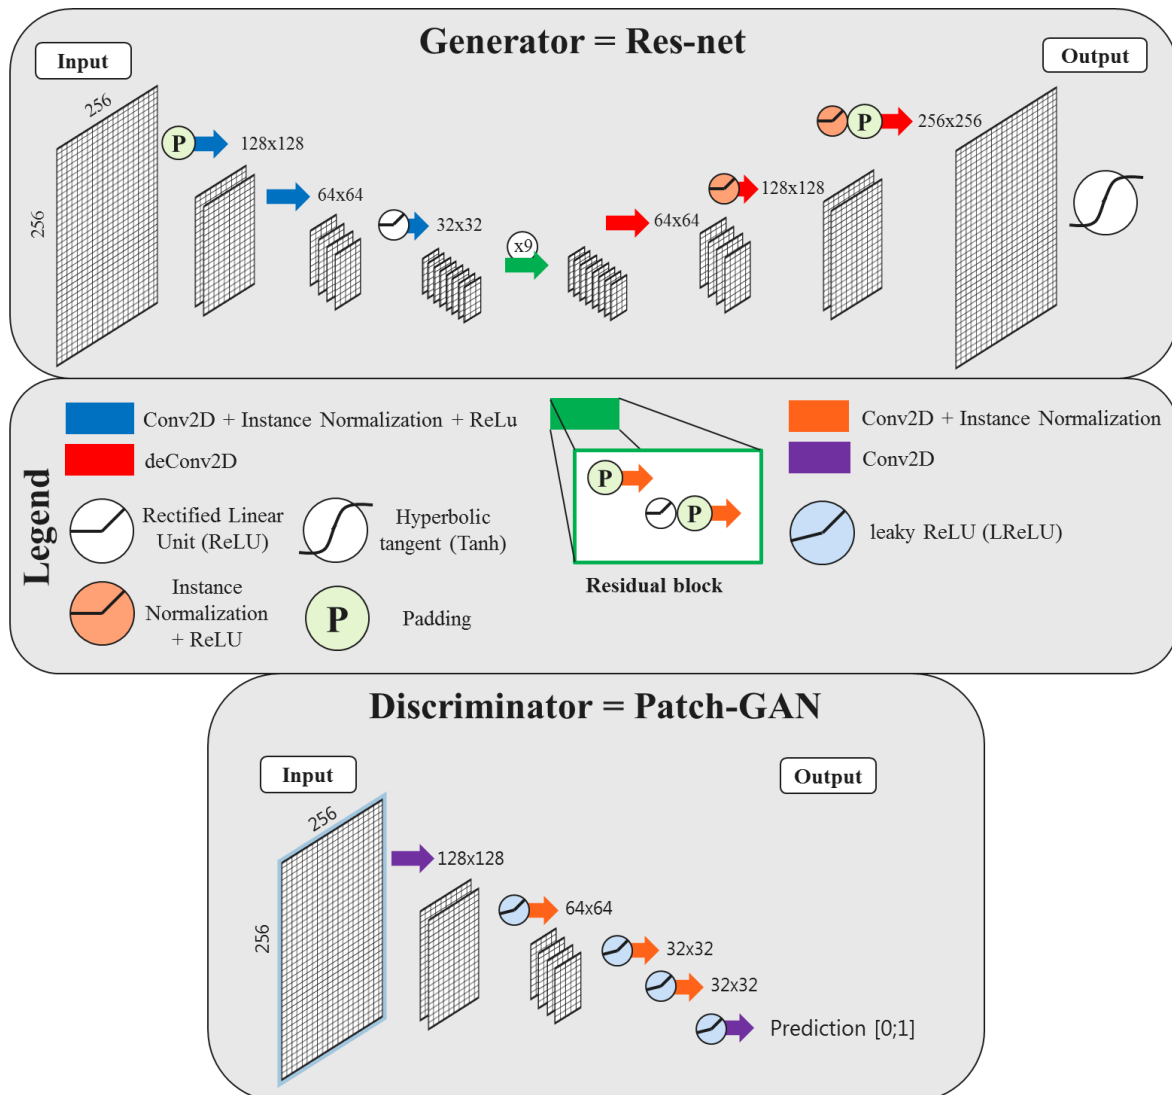

Figure S 1: Architecture of the nine-block residual network used as a generator (top) and of the convolutional network called Patch-GAN used as a discriminator. The size of the images is numerically reported, except for the residual block, where it remains stable. Note that the nine-blocks are omitted in the schematic, as well as the data-flow of the discriminator. Each of the filters had stride two, kernel size four; leaky rectilinear rectifier unit had a scalar multiplier of 0.2, padding was applied in reflect mode.

differences  $> 2\%$  (L25, L27, B31). Multiple views (e.g. axial, sagittal or coronal) are presented according to which view was most representative to explain the differences reported.

Figure S2 reports images and doses for lung cancer patient L25 and and Figure S3 for L27. For both these patients, different respiratory phases can be noticed, e.g. looking at the lower border of the lungs. For L25, residual artefact characterised by inhomogeneous HUs seem to be present along the cranio-caudal direction in the lungs: it seems that, for this case, the CBCT artefacts were not fully corrected in the lungs. The image protocols were reconsidered for L25, and it was observed that this was the only patient acquired on the linac named "U10": no training data were present for lung patients from this linac. Besides, we hypothesise that data in the test may have been imbalanced compared to data in training set for what concern linacs, as it is discussed in the body of the manuscript.

For L27, one can observe that the CBCT was characterised by severe scatter artefacts probably because the patient was obese and the image protocol has not been optimised on a patient basis. In this case, bones on sCT were not entirely recovered, probably due to the low quality of CBCT.

In Figure S4 and S5, the anatomical differences due to residual set-up differences are visible for B30 and B31. Specifically, for B30, a bolus was used, and it is evident the anatomical mismatch and difference in bolus position between rCT and sCT.

## References

- [1] de Boer HC, Heijmen BJ. A protocol for the reduction of systematic patient setup errors with minimal portal imaging workload. *Int J Radiat Oncol Biol Phys* 2001;50:1350–65. [10.1016/S0360-3016\(01\)01624-8](https://doi.org/10.1016/S0360-3016(01)01624-8).
- [2] Borgefors G. Hierarchical chamfer matching: a parametric edge matching algorithm. *IEEE Transactions on Pattern Analysis and Machine Intelligence* 1988;10:849–65. [10.1109/34.9107](https://doi.org/10.1109/34.9107).
- [3] Hristov DH, Fallone BG. A grey-level image alignment algorithm for registration of portal images and digitally reconstructed radiographs. *Med Phys* 1996;23:75–84. [10.1118/1.597743](https://doi.org/10.1118/1.597743).
- [4] Roche A, Malandain G, Pennec X, Ayache N. The correlation ratio as a new similarity measure for multimodal image registration. In: *Lecture Notes in Computer Science, MICCAI*. Springer, Berlin, Heidelberg; 1998, p. 1115–24. [10.1007/BFb0056301](https://doi.org/10.1007/BFb0056301).
- [5] Johnson J, Alahi A, Fei-Fei L. Perceptual Losses for Real-Time Style Transfer and Super-Resolution. *Computer Vision ECCV 2016* 2016;;694–71110. [1007/978-3-319-46475-6\\_43](https://doi.org/10.1007/978-3-319-46475-6_43).
- [6] Isola P, Zhu JY, Zhou T, Efros AA. Image-to-Image Translation with Conditional Adversarial Networks. In: *2017 IEEE Conference on Computer Vision and Pattern Recognition (CVPR)*. IEEE. ISBN 978-1-5386-0457-1; 2017, p. 5967–76. <https://doi.org/10.1109/CVPR.2017.632>.
- [7] Kingma DP, Ba J. Adam: A Method for Stochastic Optimization. *arXiv preprint arXiv:1412.6980* 2014;[arXiv:1412.6980](https://arxiv.org/abs/1412.6980).
- [8] Ulyanov D, Vedaldi A, Lempitsky V. Instance Normalization: The Missing Ingredient for Fast Stylization. *arXiv preprint arXiv:1607.08022* 2016;[arXiv:1607.08022](https://arxiv.org/abs/1607.08022).
- [9] Goodfellow I, Pouget-Abadie J, Mirza M, Xu B, Warde-Farley D, Ozair S, et al. Generative Adversarial Nets. In: Ghahramani Z, Welling M, Cortes C, Lawrence ND, Weinberger KQ, editors. *Advances in Neural Information Processing Systems 27*. Curran Associates, Inc.; 2014, p. 2672–80.
- [10] Zhu JY, Park T, Isola P, Efros AA. Unpaired image-to-image translation using cycle-consistent adversarial networks. In: *2017 IEEE International Conference on Computer Vision (ICCV)*. Venice: IEEE; 2017, p. 2242–51. URL: <https://doi.org/10.1109/ICCV.2017.244>.
- [11] Liang X, Chen L, Nguyen D, Zhou Z, Gu X, Yang M, et al. Generating synthesized computed tomography (CT) from cone-beam computed tomography (CBCT) using CycleGAN for adaptive radiation therapy. *Phys Med Biol* 2019;64:125002. <https://doi.org/10.1088/1361-6560/ab22f9>.



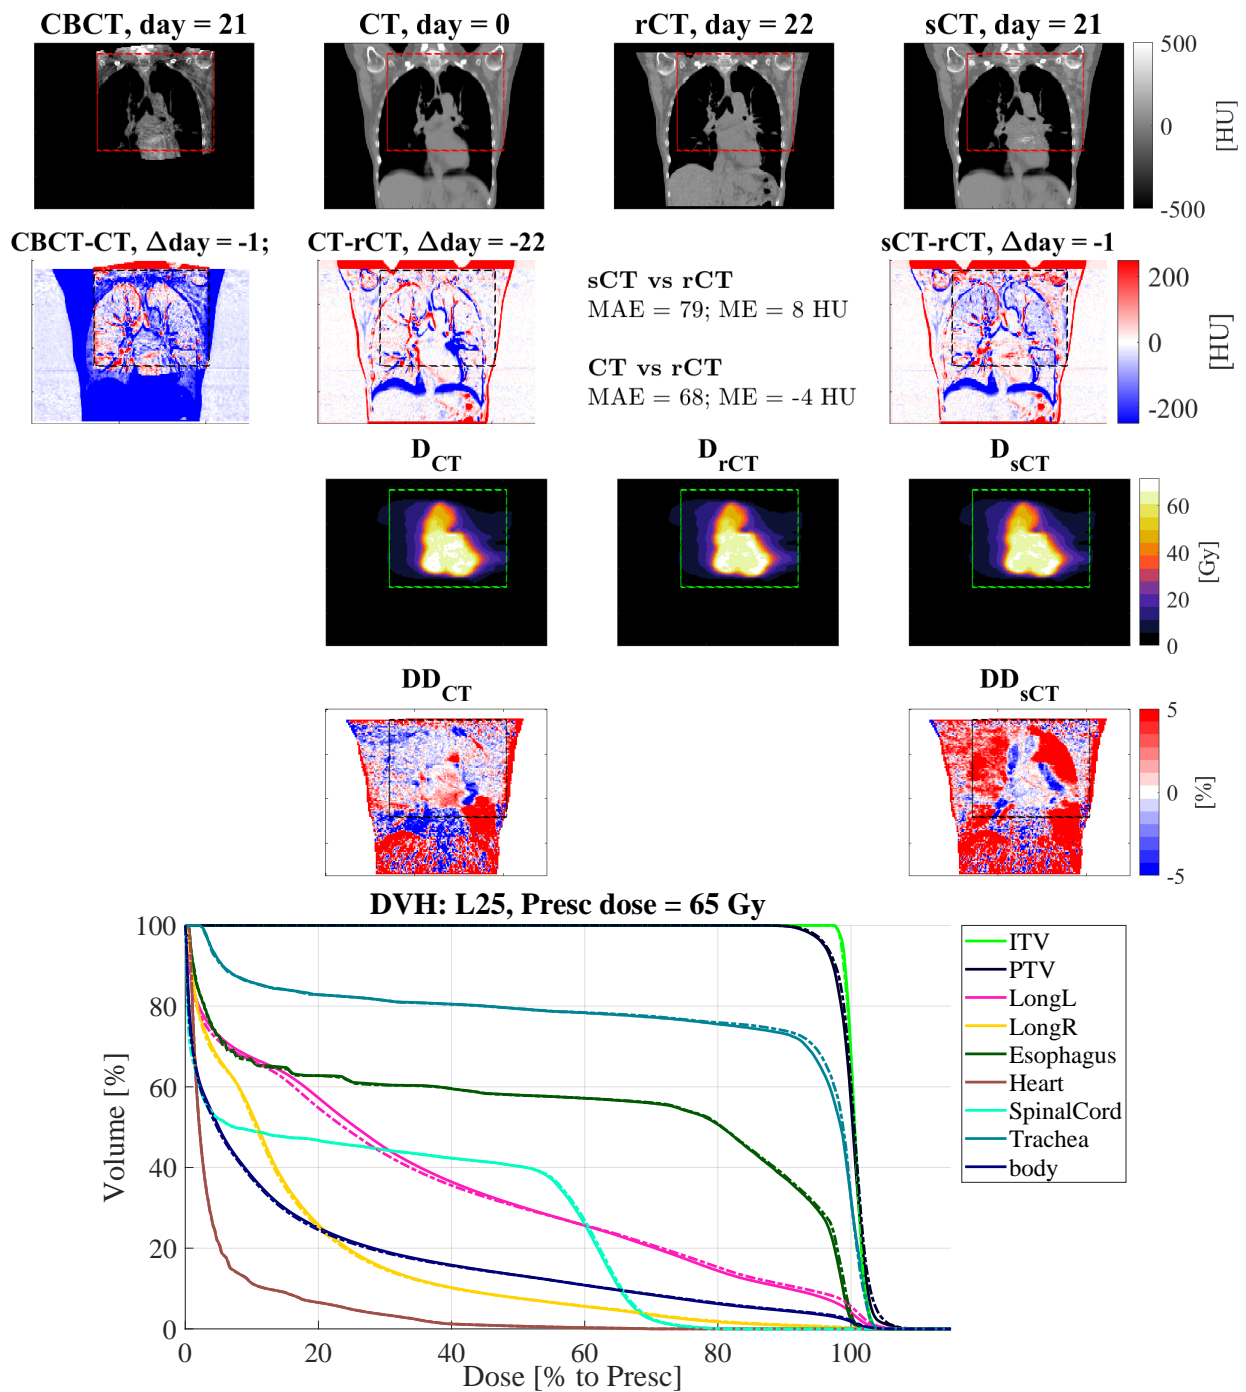

Figure S 2: Coronal views for the lung cancer patient L25 of: (1<sup>st</sup> row) CBCT (1<sup>st</sup> column), CT (2<sup>nd</sup> column), rescanned CT (rCT, 3<sup>rd</sup> column) and synthetic CT (sCT, 4<sup>th</sup> column), along with (2<sup>nd</sup> row) the respective difference to rCT, and the doses (3<sup>rd</sup> row) and the relative dose differences (4<sup>th</sup> row). The red, black, or green dotted rectangles indicate the position of Mask<sub>CBCT</sub>. The days refer to the acquisition date relative to the planning CT. In the 5<sup>th</sup> row, the DVH is shown for target and OARs of sCT (solid lines) and rCT (dashed lines).

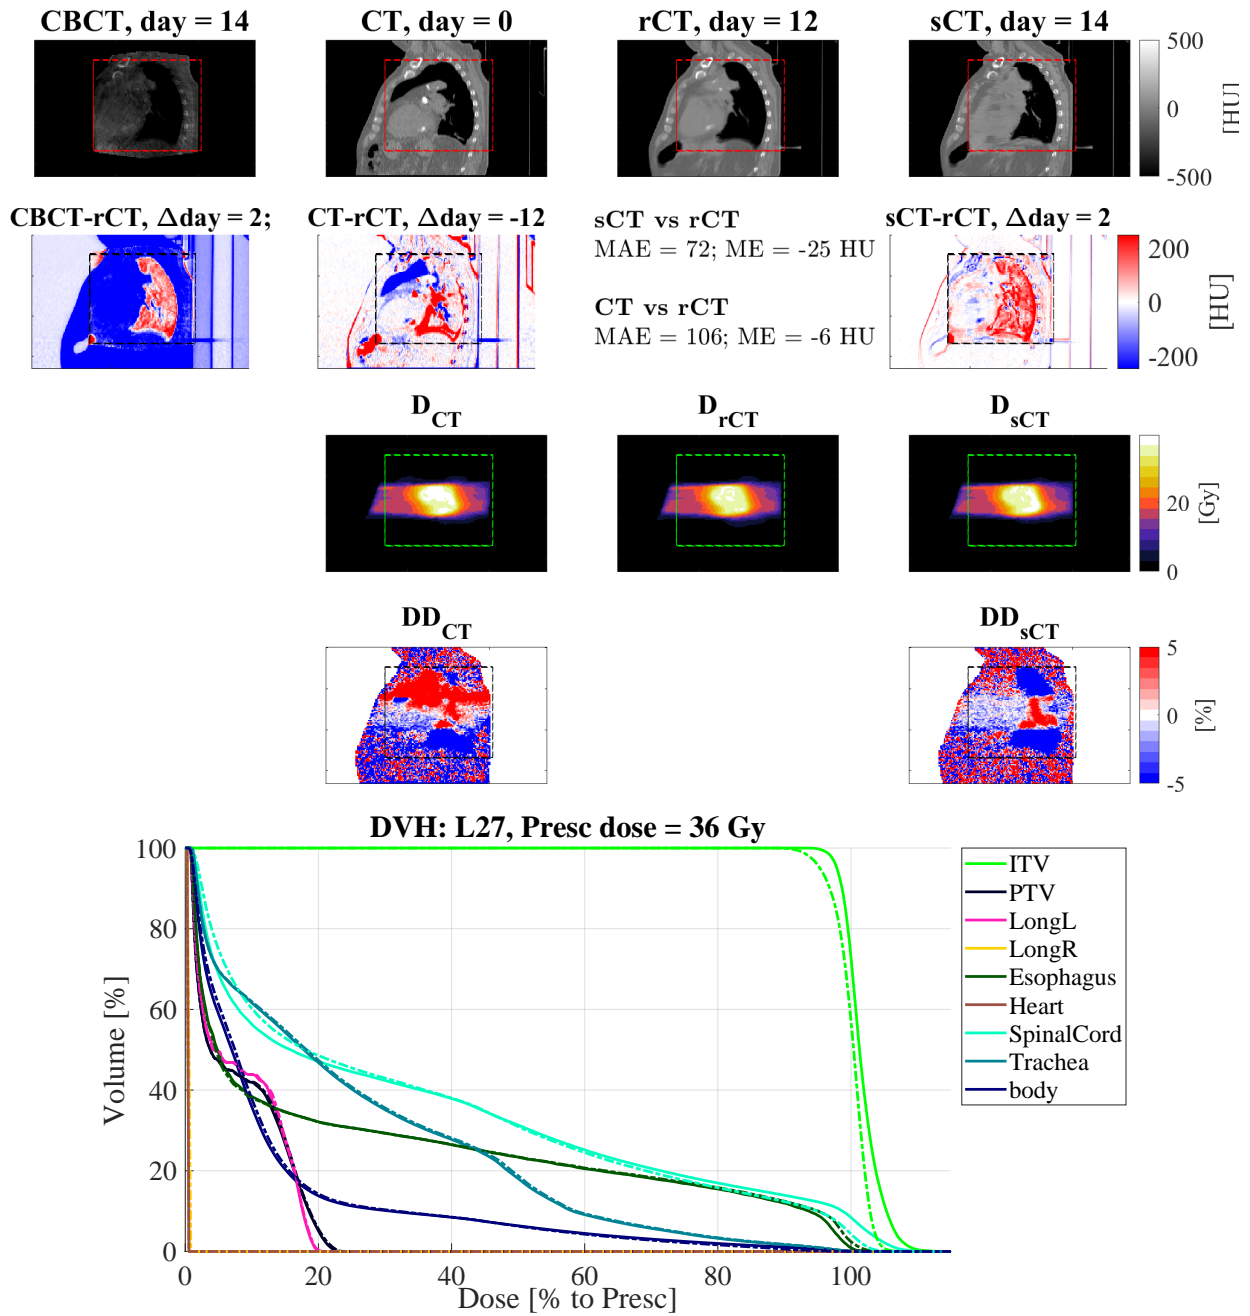

Figure S 3: Sagittal views for the lung cancer patient L27 of: (1<sup>st</sup> row) CBCT (1<sup>st</sup> column), CT (2<sup>nd</sup> column), rescanned CT (rCT, 3<sup>rd</sup> column) and synthetic CT (sCT, 4<sup>th</sup> column), along with (2<sup>nd</sup> row) the respective difference to rCT, and the doses (3<sup>rd</sup> row) and the relative dose differences (4<sup>th</sup>). The red, black, or green dotted rectangles indicate the position of Mask<sub>CBCT</sub>. The days refer to the acquisition date relative to the planning CT. In the 5<sup>th</sup> row, the DVH is shown for target and OARs of sCT (solid lines) and rCT (dashed lines).

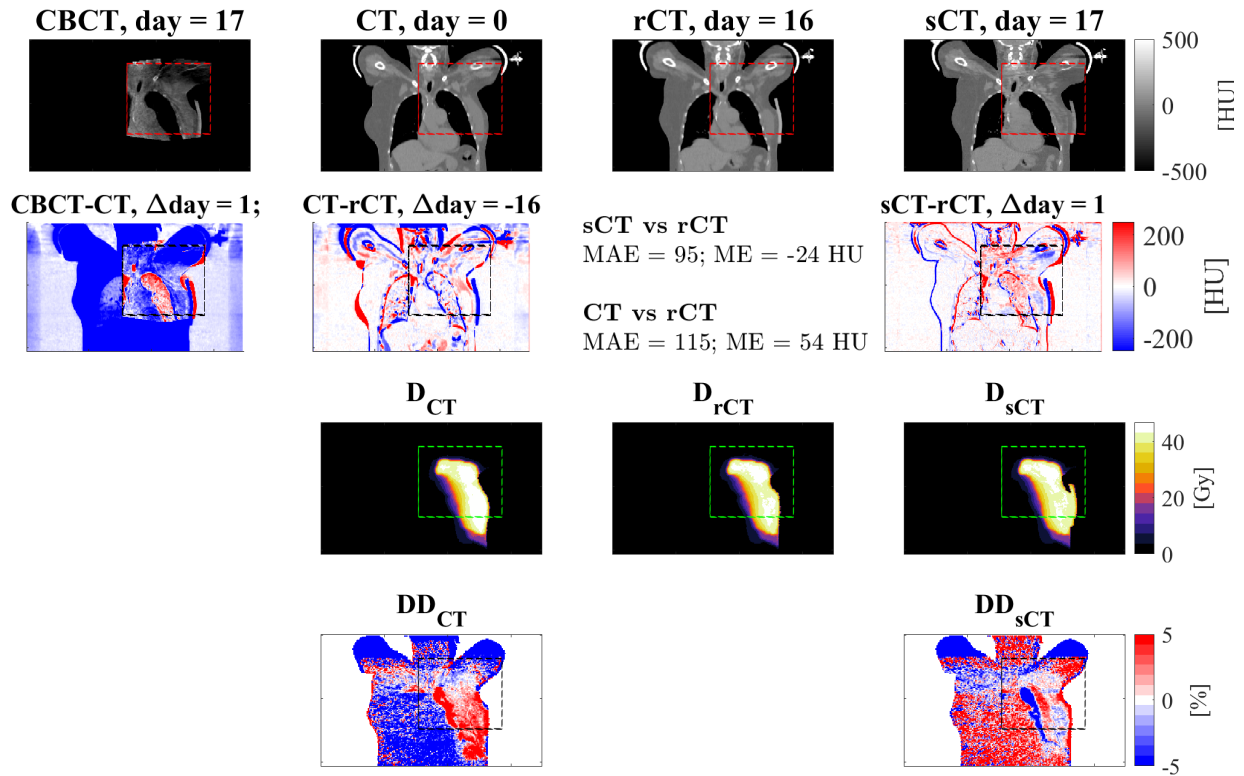

**DVH: B30, Presc dose = 42.56 Gy**

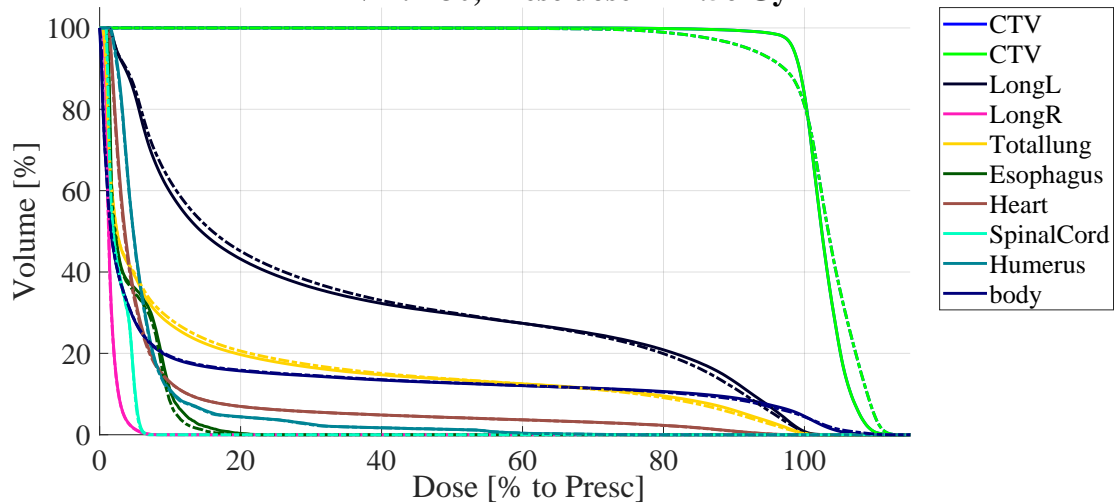

Figure S 4: Coronal views for the breast cancer patient B30 of: (1<sup>st</sup> row) CBCT (1<sup>st</sup> column), CT (2<sup>nd</sup> column), rescanned CT (rCT, 3<sup>rd</sup> column) and synthetic CT (sCT, 4<sup>th</sup> column), along with (2<sup>nd</sup> row) the respective difference to rCT, and the doses (3<sup>rd</sup> row) and the relative dose differences (4<sup>th</sup>). The red, black, or green dotted rectangles indicate the position of Mask<sub>CBCT</sub>. The days refer to the acquisition date relative to the planning CT. In the 5<sup>th</sup> row, the DVH is shown for target and OARs of sCT (solid lines) and rCT (dashed lines).

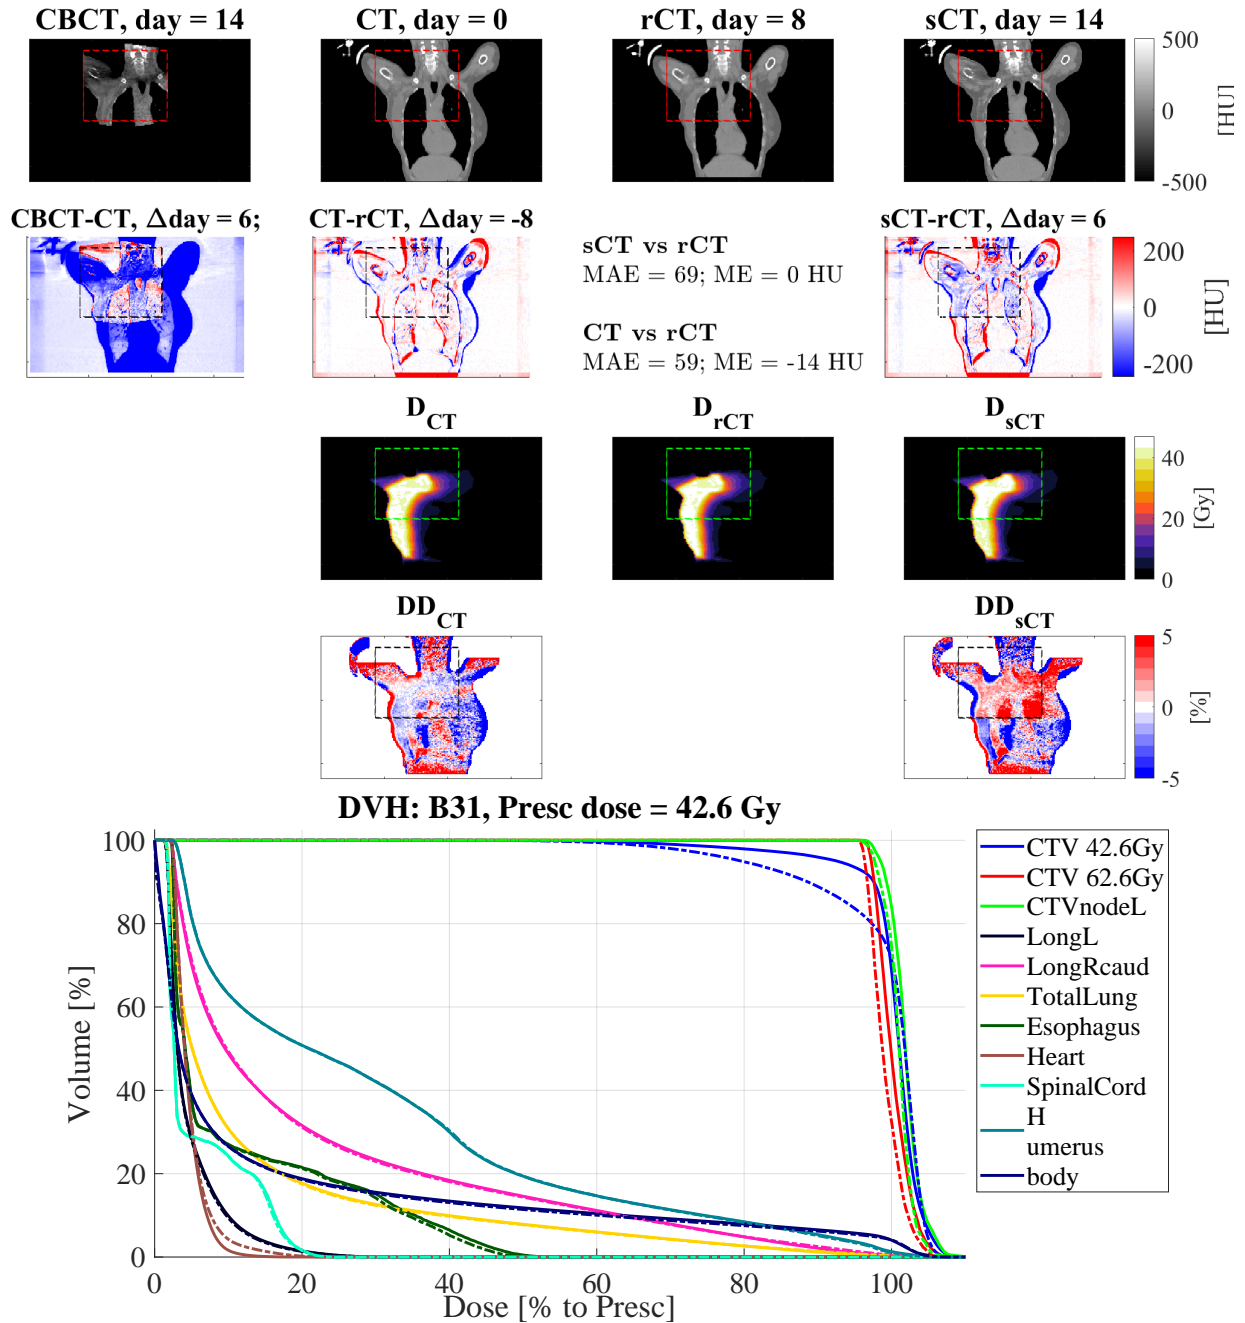

Figure S 5: Coronal views for the breast cancer patient B31 of: (1<sup>st</sup> row) CBCT (1<sup>st</sup> column), CT (2<sup>nd</sup> column), rescanned CT (rCT, 3<sup>rd</sup> column) and synthetic CT (sCT, 4<sup>th</sup> column), along with (2<sup>nd</sup> row) the respective difference to rCT, and the doses (3<sup>rd</sup> row) and the relative dose differences (4<sup>th</sup>). The red, black, or green dotted rectangles indicate the position of Mask<sub>CBCT</sub>. The days refer to the acquisition date relative to the planning CT. In the 5<sup>th</sup> row, the DVH is shown for target and OARs of sCT (solid lines) and rCT (dashed lines).
